# Supplementary material for: HnRNPA2B1 Aggravates Inflammation by Promoting M1 Macrophage Polarization
Source: MDPI journal article supplement (doi:10.3390/nu15071555), 2023-03-23
Supplement: s1 [file s1]

**Table S1.** Primers used in qPCR.

| Gene           | Forward                 | Reverse                |
|----------------|-------------------------|------------------------|
| $\beta$ -actin | GGCTGTATCCCCCTCCATCG    | CCAGTTGGTAACAATGCCATGT |
| Hnnpa2b1       | CAGGGTAGTTGAGCCAAAACG   | TTCCAGACTGCCTATCGGTAA  |
| Tnfa           | CCCTCACACTCAGATCATCTTCT | GCTACGACGTGGGCTACAG    |
| Il-6           | GGGACTGATGCTGGTGACAA    | TGCCATTGCACAACCTCTTTCT |
| Il-1 $\beta$   | GAAATGCCACCTTTTGACAGTG  | TGGATGCTCTCATCAGGACAG  |
| Pdgfra         | ATGAGAGTGAGATCGAAGGCA   | CGGCAAGGTATGATGGCAGAG  |
| Pdgfr $\beta$  | CAAGAAGCGGCCATGAATCAG   | CGGCCCTAGTGAGTTGTTGT   |
| Ki67           | ATCATTGACCGCTCCTTTAGGT  | GCTCGCCTTGATGGTTCCT    |

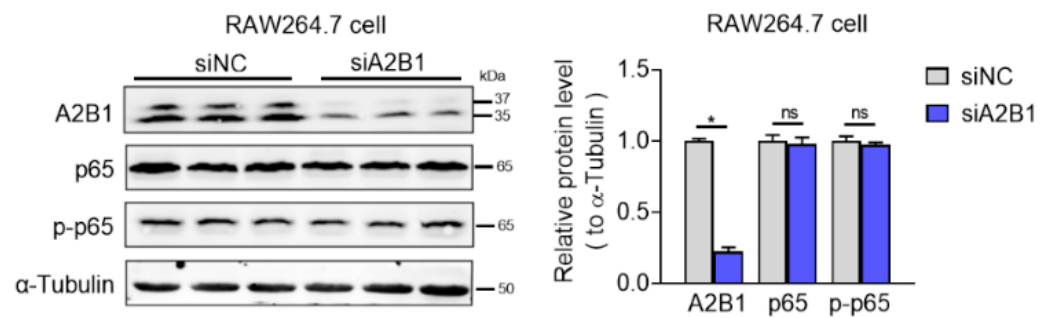

**Figure S1.** The NF-kappaB activation is not altered in hnRNPA2B1-silenced macrophages. hnRNPA2B1, p65 and p-p65 protein levels in NC and A2B1 knockdown (siA2B1) LPS-treated macrophages. Results are shown as mean  $\pm$  SEM; ns, not significant; \*  $p < 0.05$ .
